# Supplementary material for: New Methods for the Synthesis of Spirocyclic Cephalosporin Analogues
Source: MDPI journal article supplement (doi:10.3390/molecules26196035), 2021-10-05
Supplement: s1 [file s1]

# New Methods for the Synthesis of Spirocyclic Cephalosporin Analogues

Alan X. Zhao <sup>1</sup>, Louise E. Horsfall <sup>2</sup> and Alison N. Hulme <sup>1,\*</sup>

<sup>1</sup> EaStChem School of Chemistry, The University of Edinburgh, Joseph Black Building, David Brewster Road, Edinburgh EH9 3FJ, UK; [s1117565@sms.ed.ac.uk](mailto:s1117565@sms.ed.ac.uk) (A.X.Z)

<sup>2</sup> Institute of Quantitative Biology, Biochemistry, and Biotechnology, School of Biological Science, The University of Edinburgh, Roger Land Building, Alexander Crum Brown Road, Edinburgh, EH9 3FF, UK; [louise.horsfall@ed.ac.uk](mailto:louise.horsfall@ed.ac.uk) (L.E.H)

\* Correspondence: [Alison.Hulme@ed.ac.uk](mailto:Alison.Hulme@ed.ac.uk)

| Page | Contents                                                                                                |
|------|---------------------------------------------------------------------------------------------------------|
| S2   | <sup>1</sup> H and <sup>13</sup> C NMR spectra for spirocyclisation compounds <b>5</b> and <b>13-19</b> |
| S9   | <sup>1</sup> H and <sup>13</sup> C NMR spectra for PMB deprotection compounds <b>20-26</b>              |

Raw data files for 1D and 2D NMR spectra, for compounds **5** and **13-26** can be found at <https://doi.org/10.7488/ds/3144>

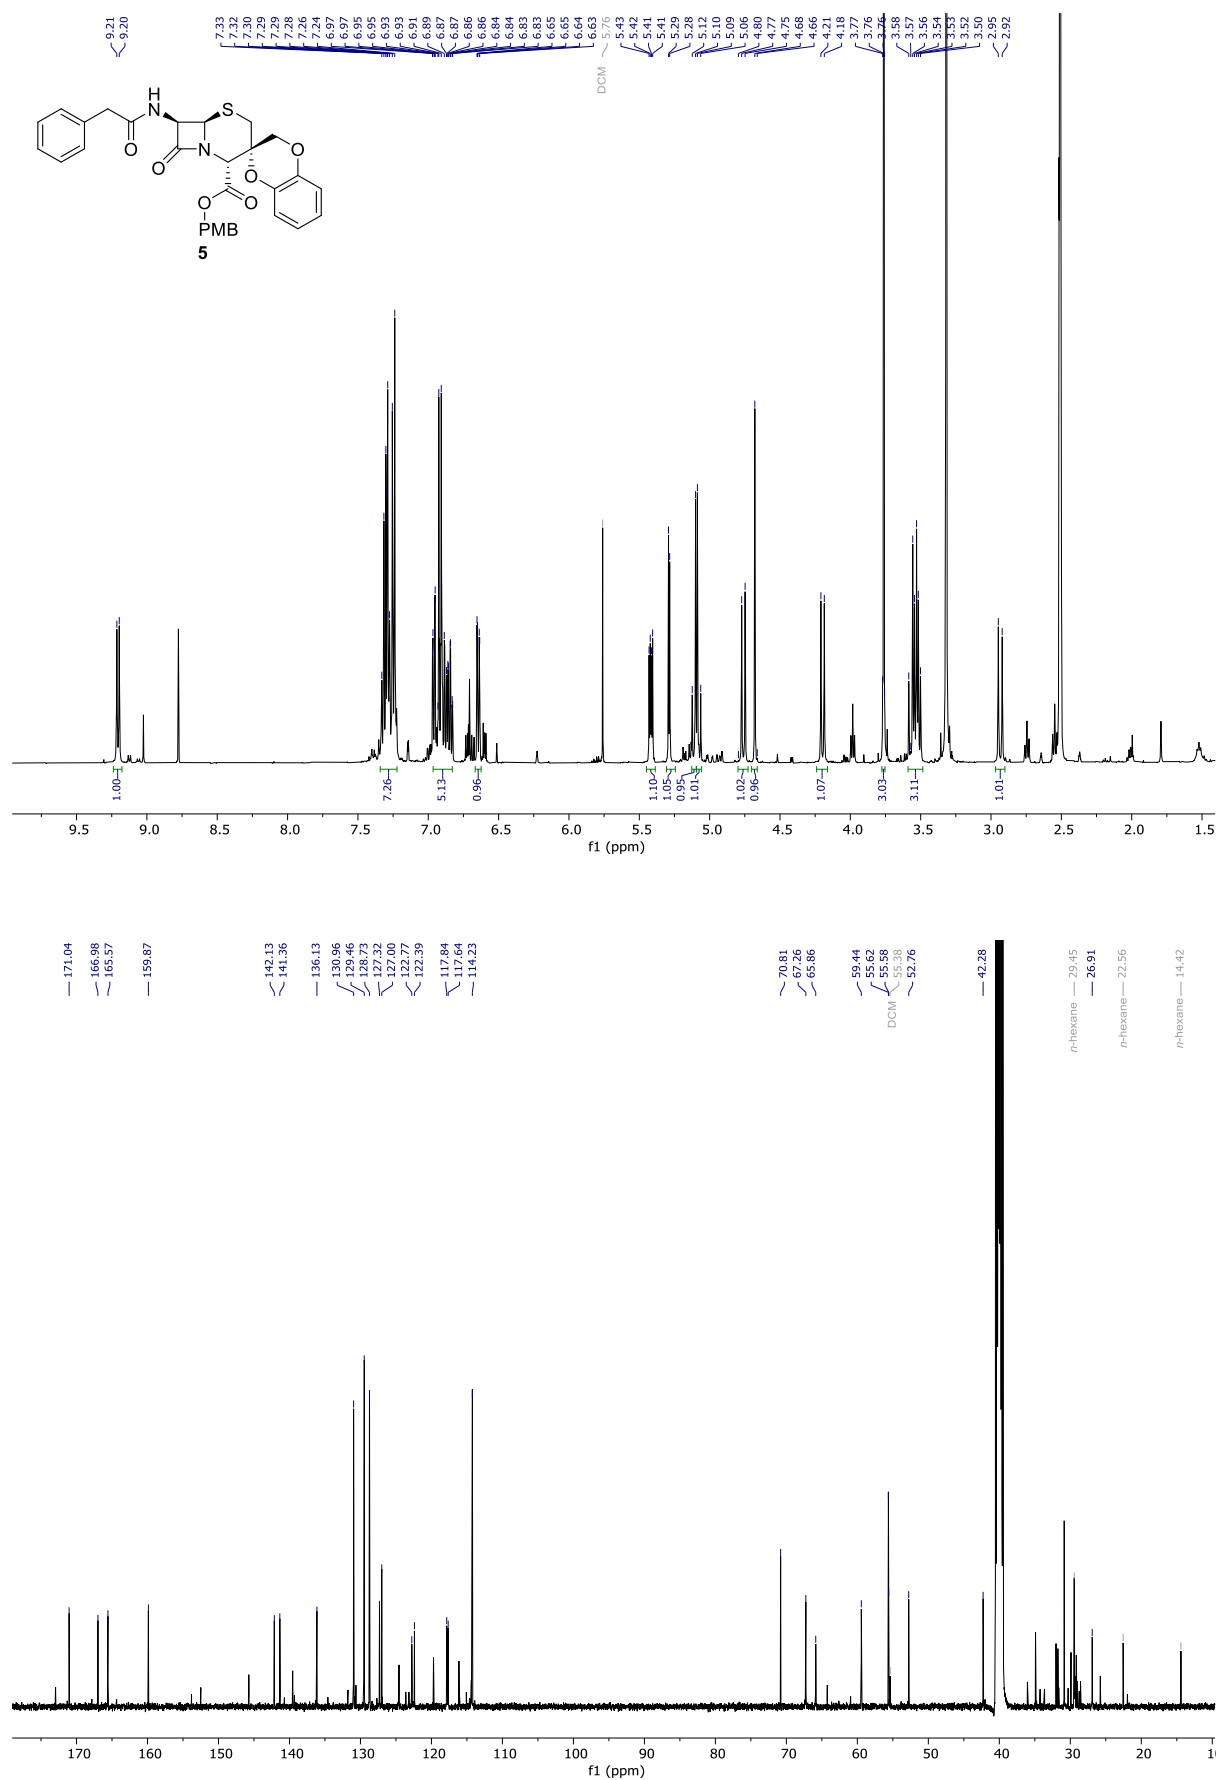

Figure S1.  $^1\text{H}$  (top) and  $^{13}\text{C}$  NMR (bottom) spectra of spiro-compound **5**.

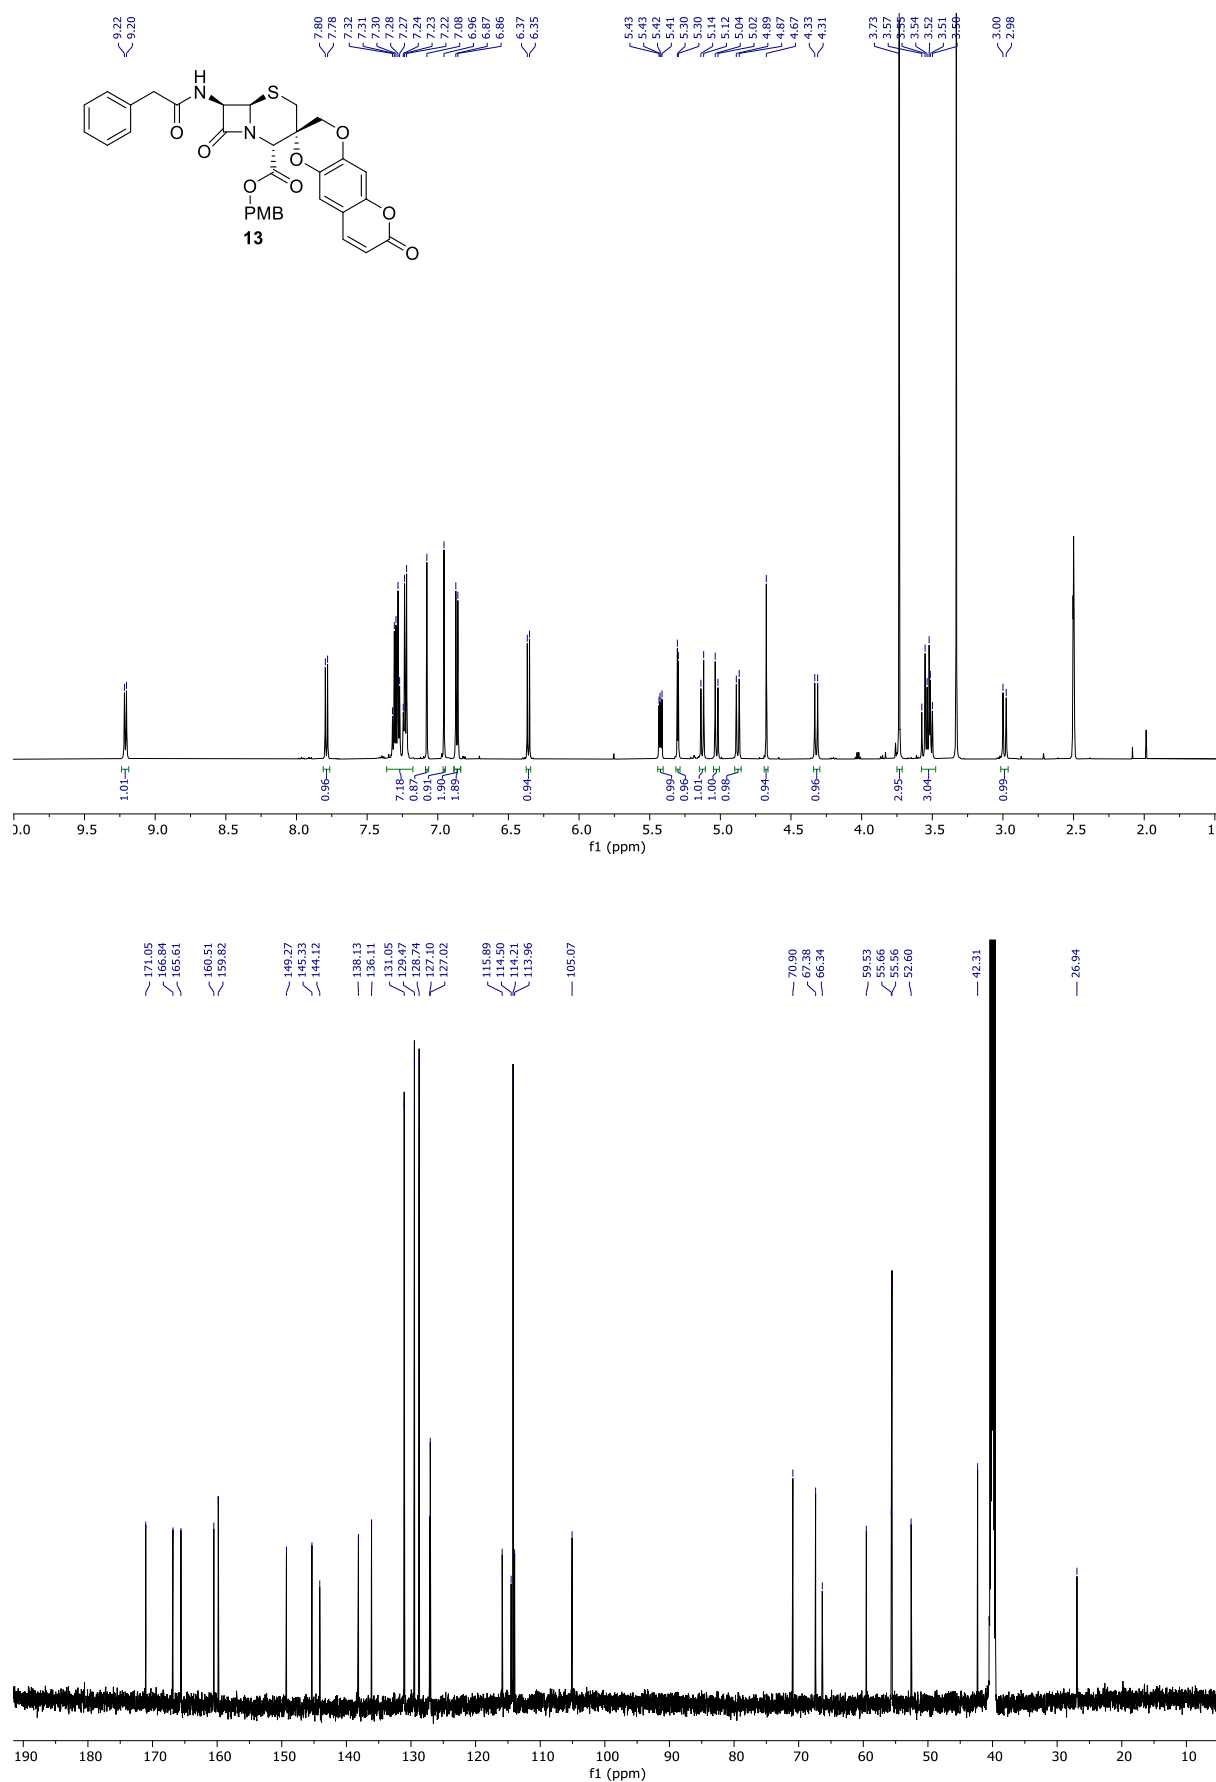

**Figure S2.**  $^1\text{H}$  (top) and  $^{13}\text{C}$  NMR (bottom) spectra of spiro-compound **13**.

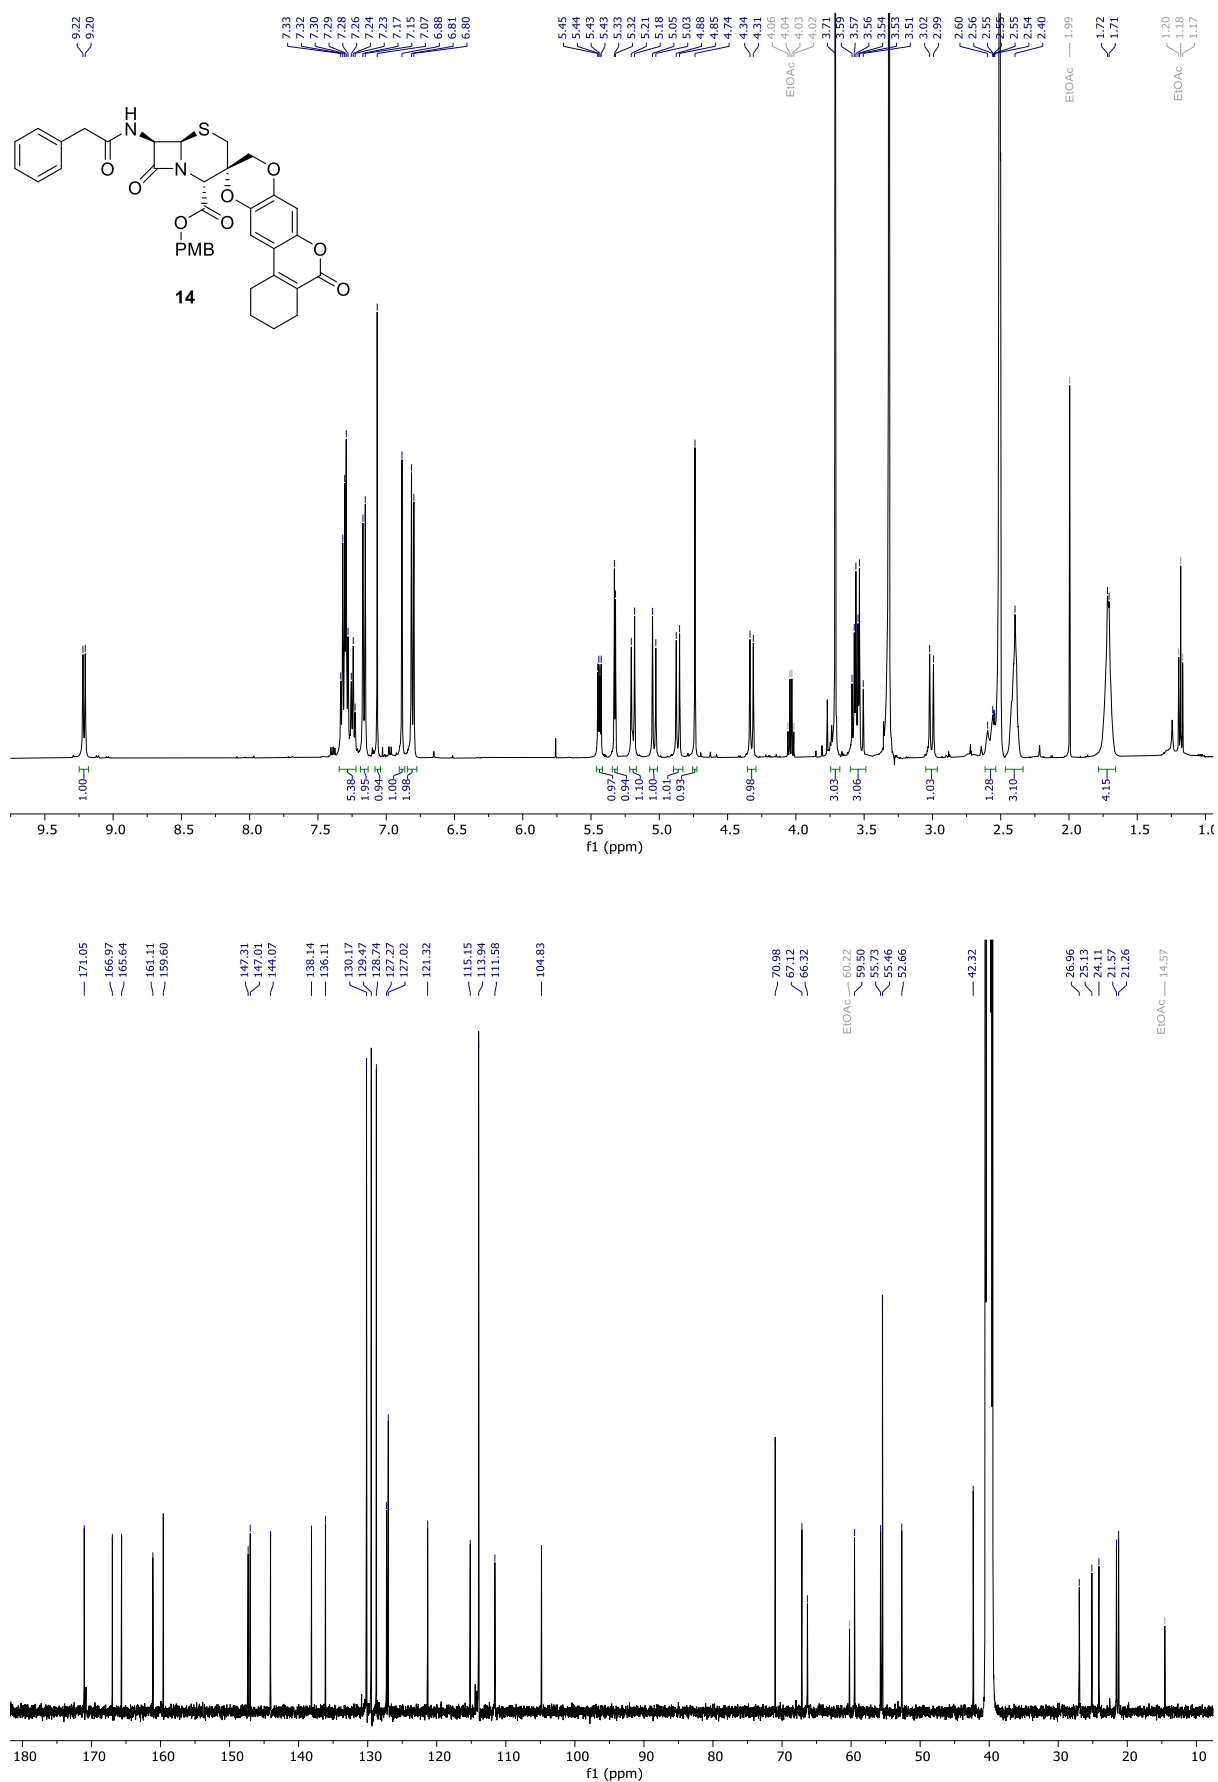

Figure S3.  $^1\text{H}$  (top) and  $^{13}\text{C}$  NMR (bottom) spectra of spiro-compound **14**.

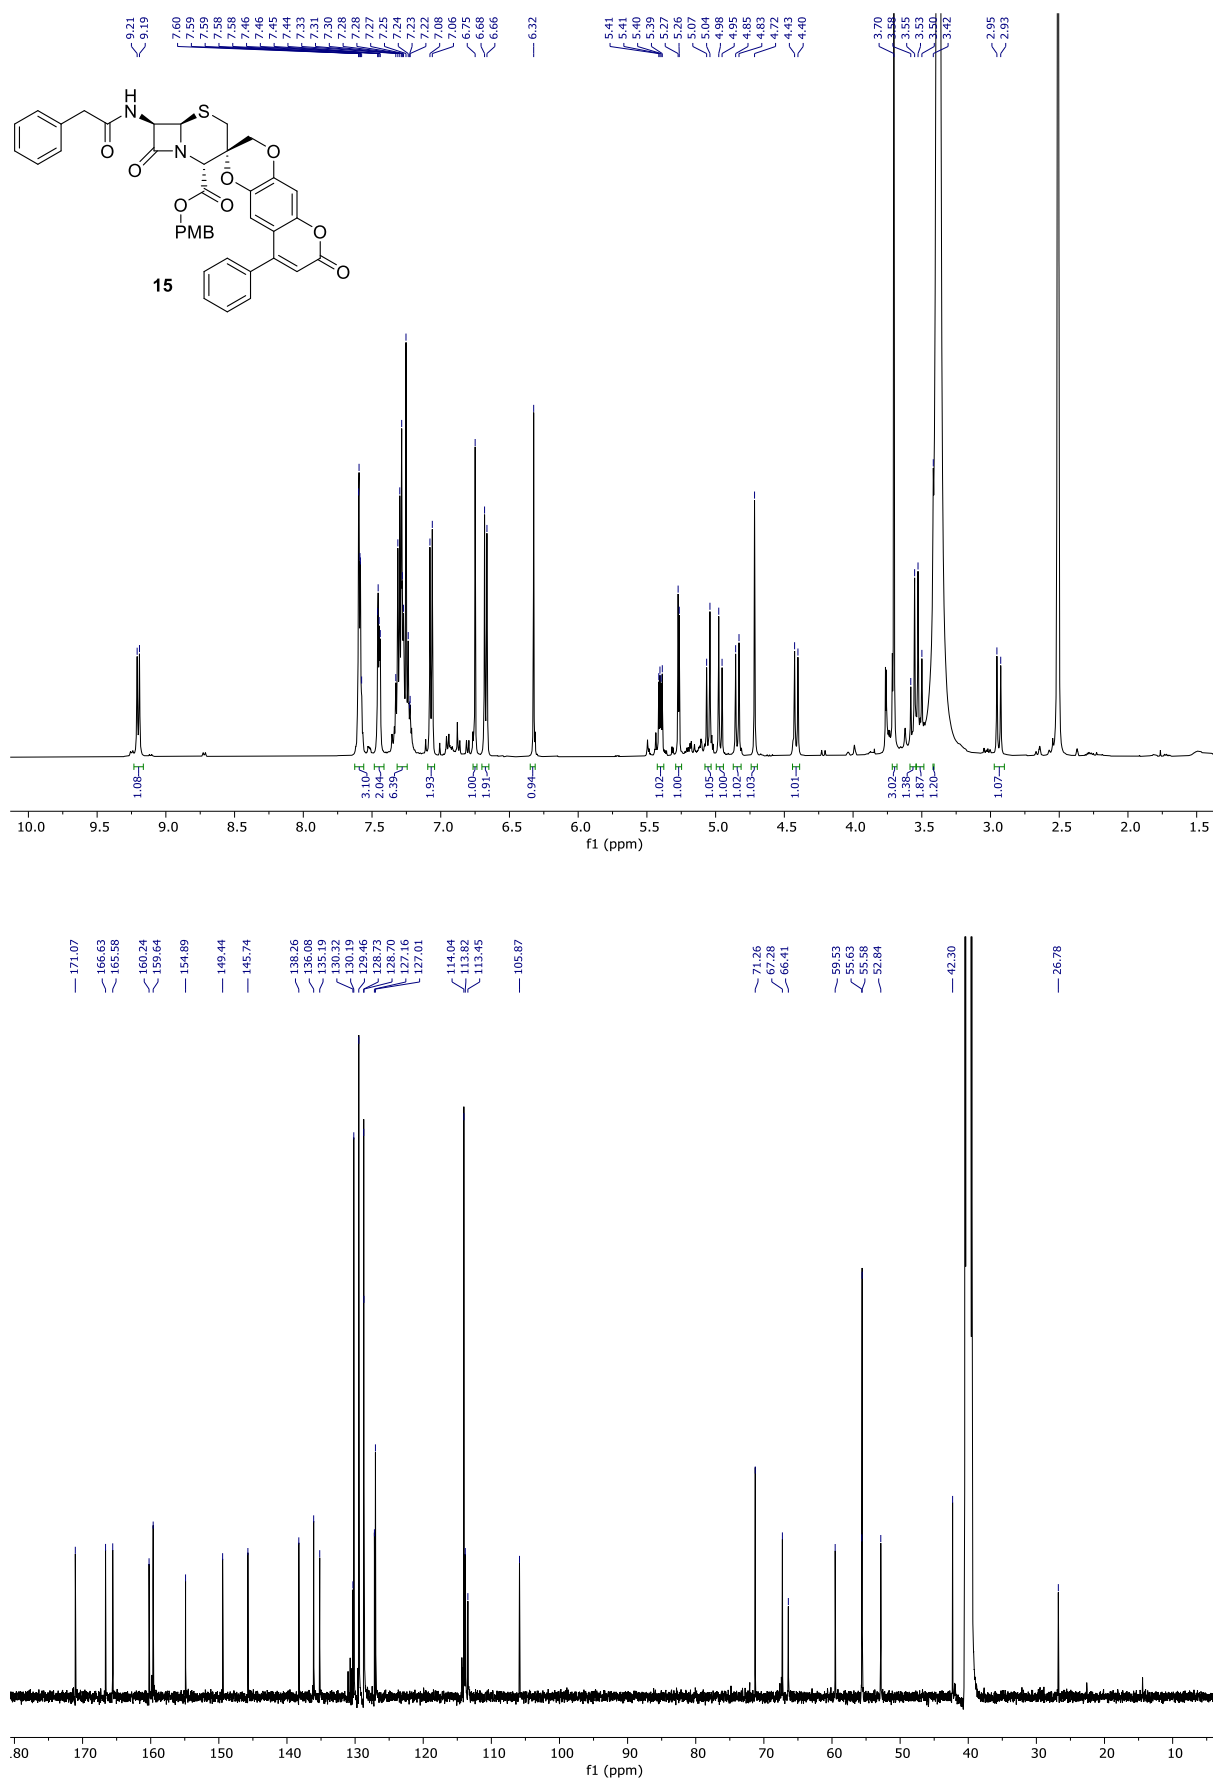

Figure S4. <sup>1</sup>H (top) and <sup>13</sup>C NMR (bottom) spectra of spiro-compound **15**.

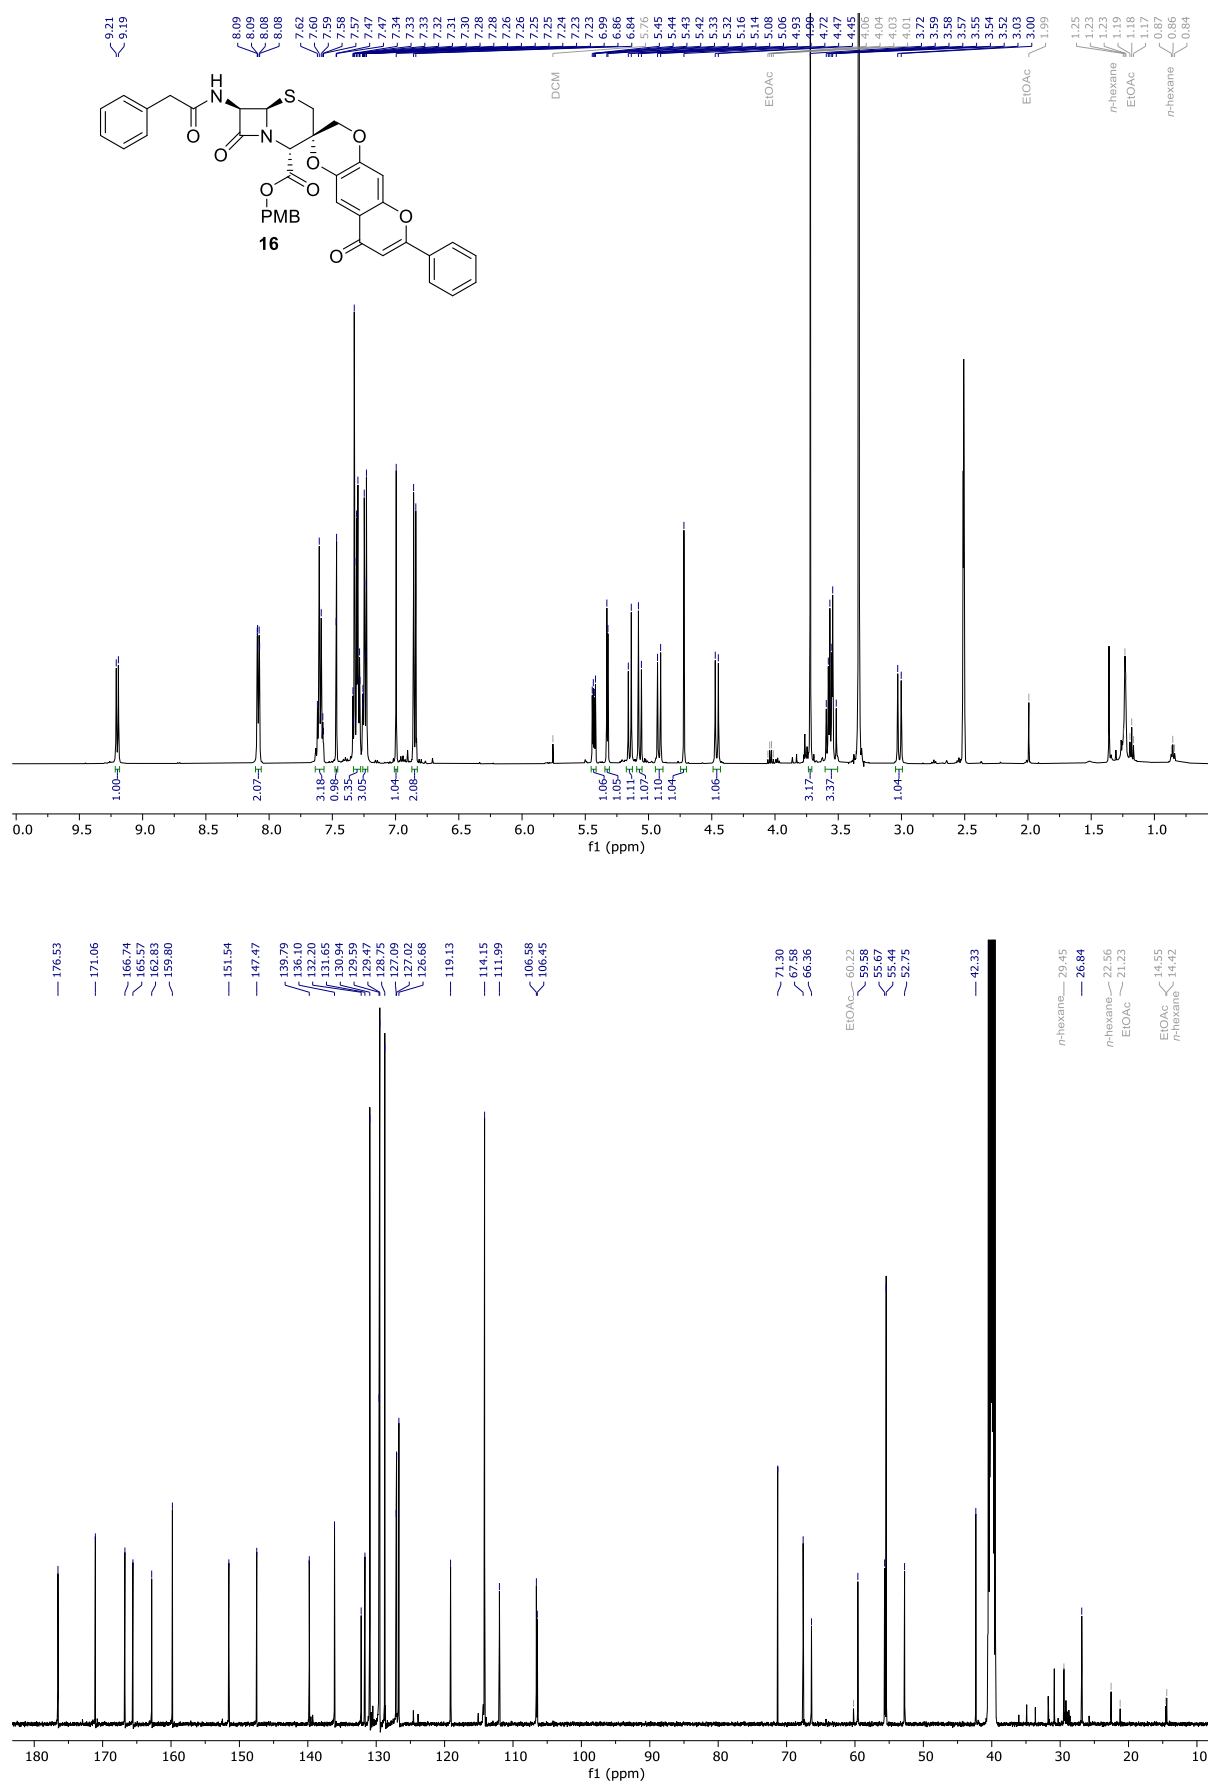

Figure S5. <sup>1</sup>H (top) and <sup>13</sup>C NMR (bottom) spectra of spiro-compound 16.

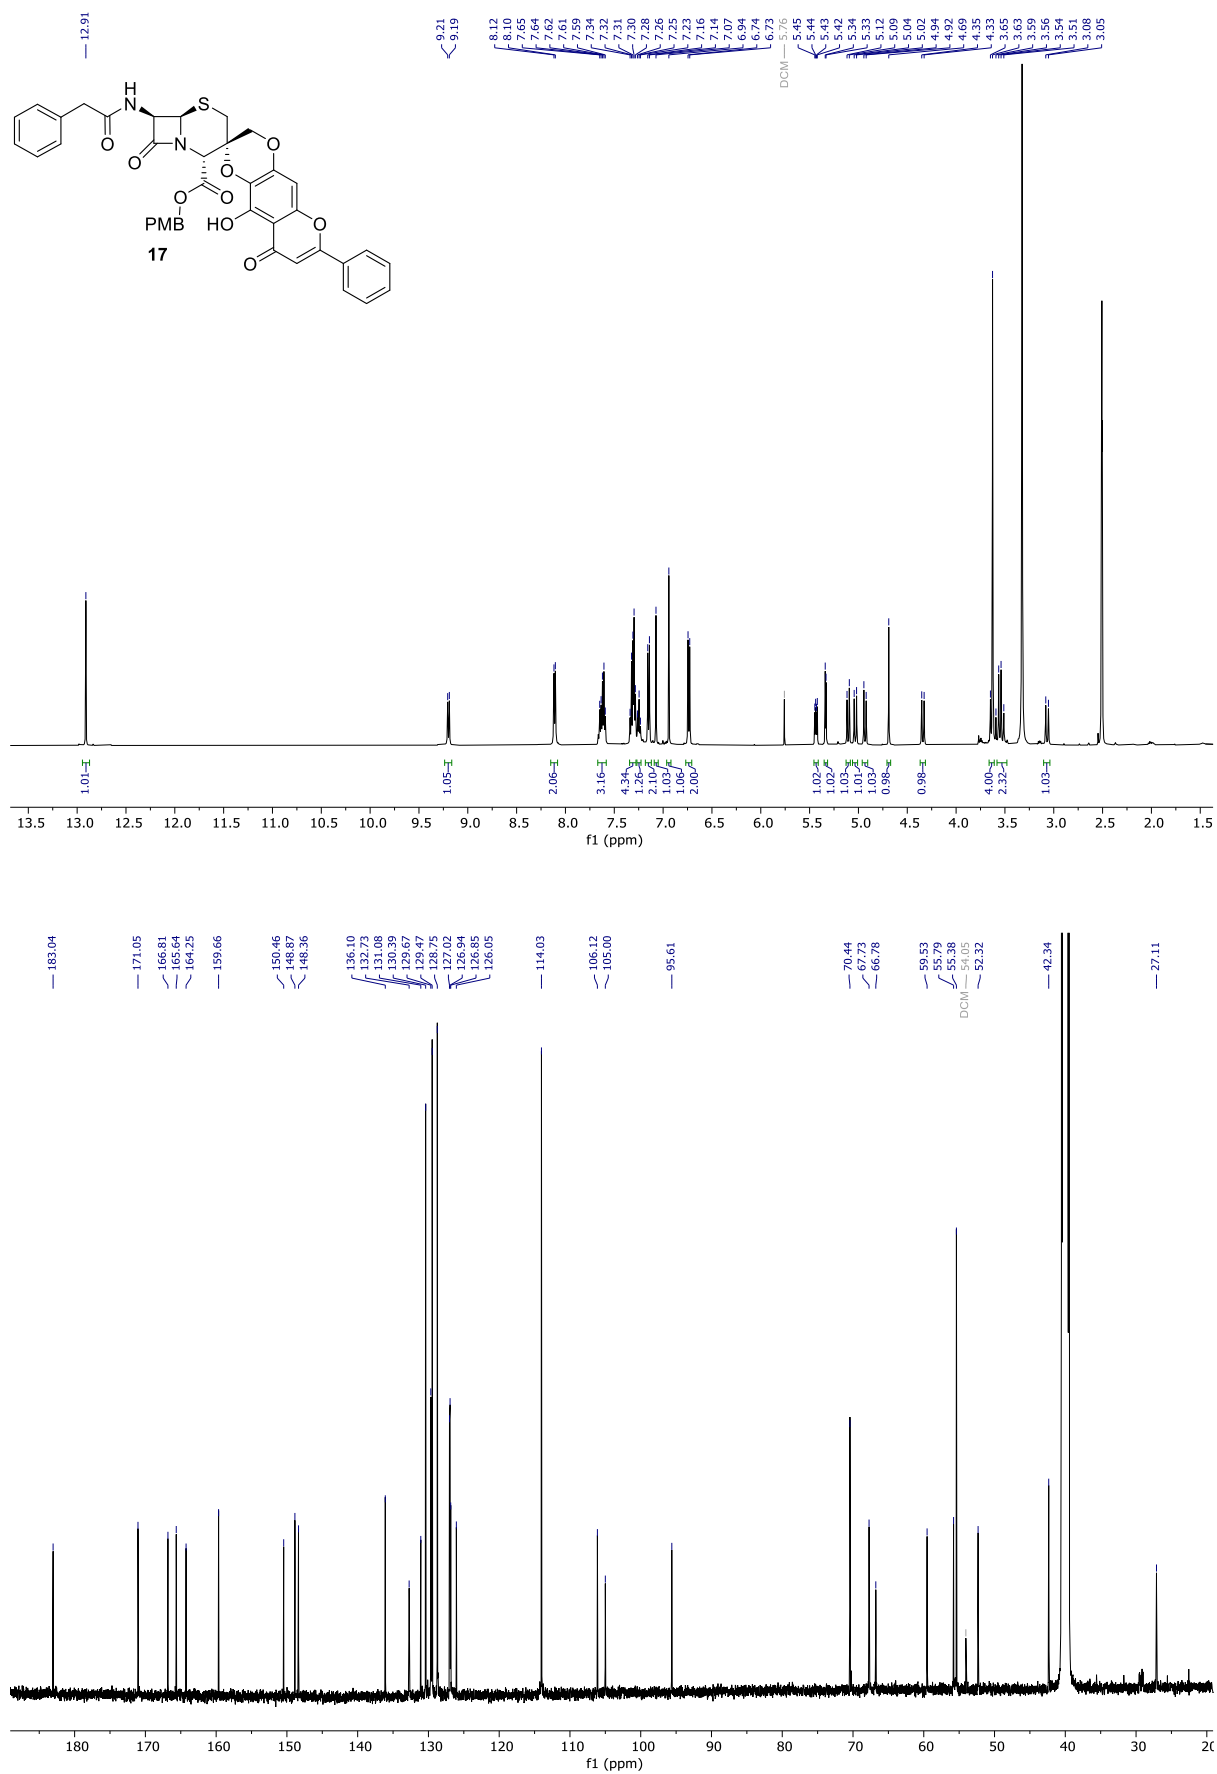

Figure S6.  $^1\text{H}$  (top) and  $^{13}\text{C}$  NMR (bottom) spectra of spiro-compound **17**.

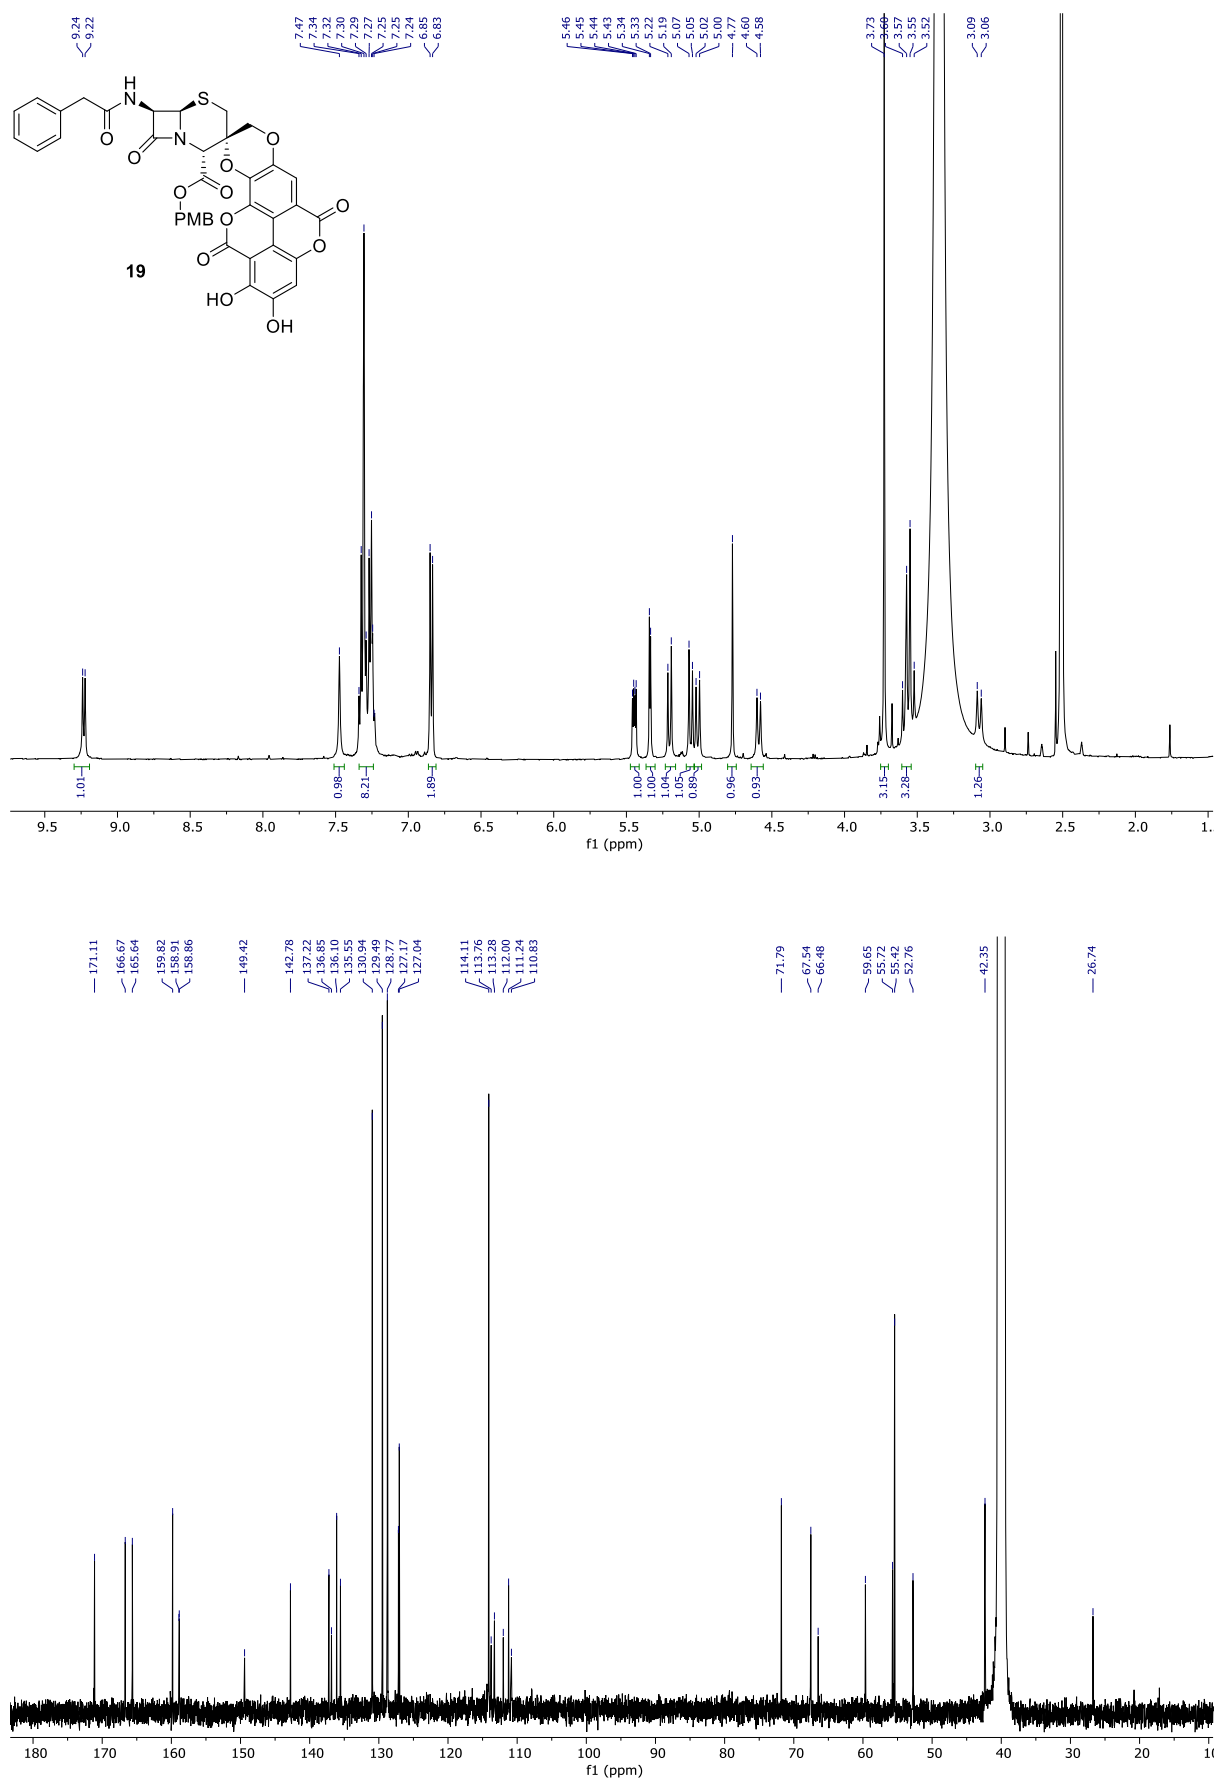

Figure S7. <sup>1</sup>H (top) and <sup>13</sup>C NMR (bottom) spectra of spiro-compound **19**.



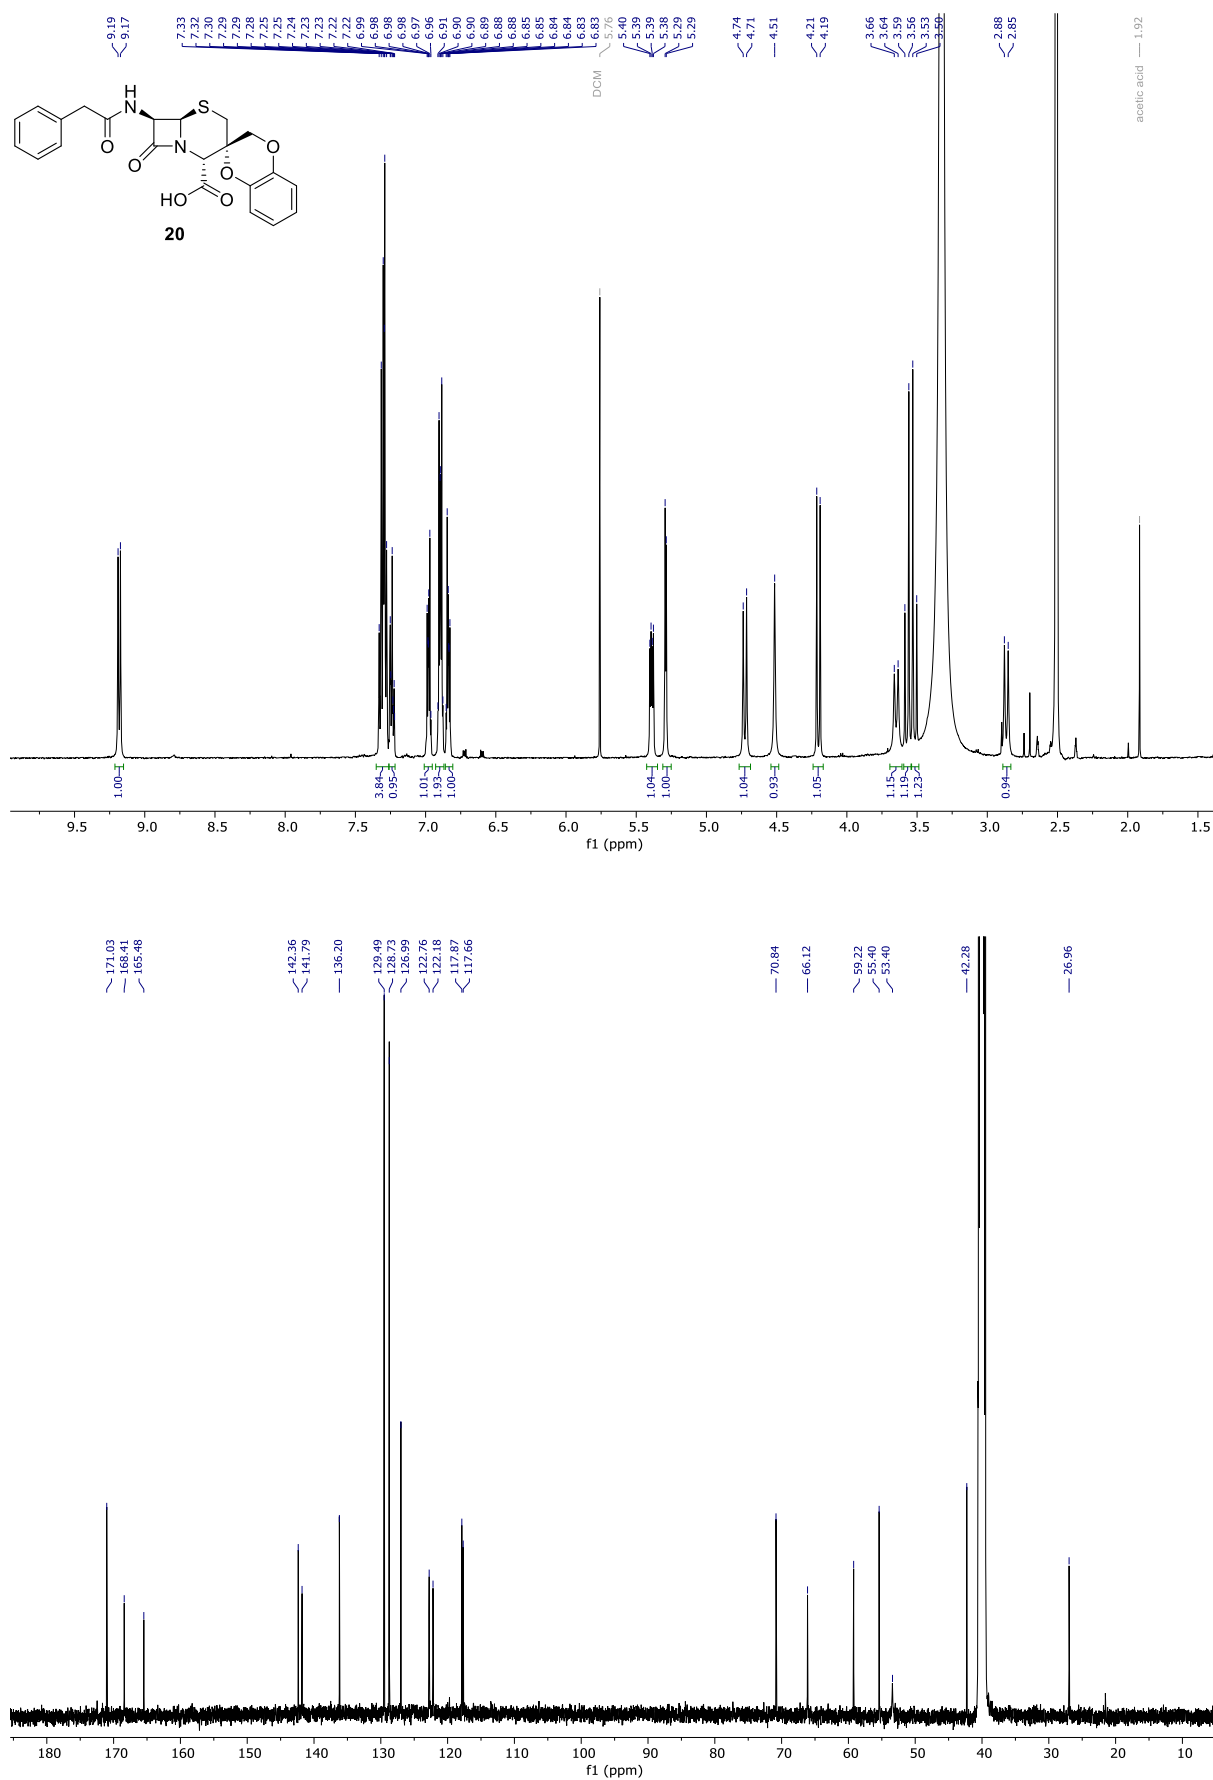

Figure S8.  $^1\text{H}$  (top) and  $^{13}\text{C}$  NMR (bottom) spectra of spiro-compound **20**.

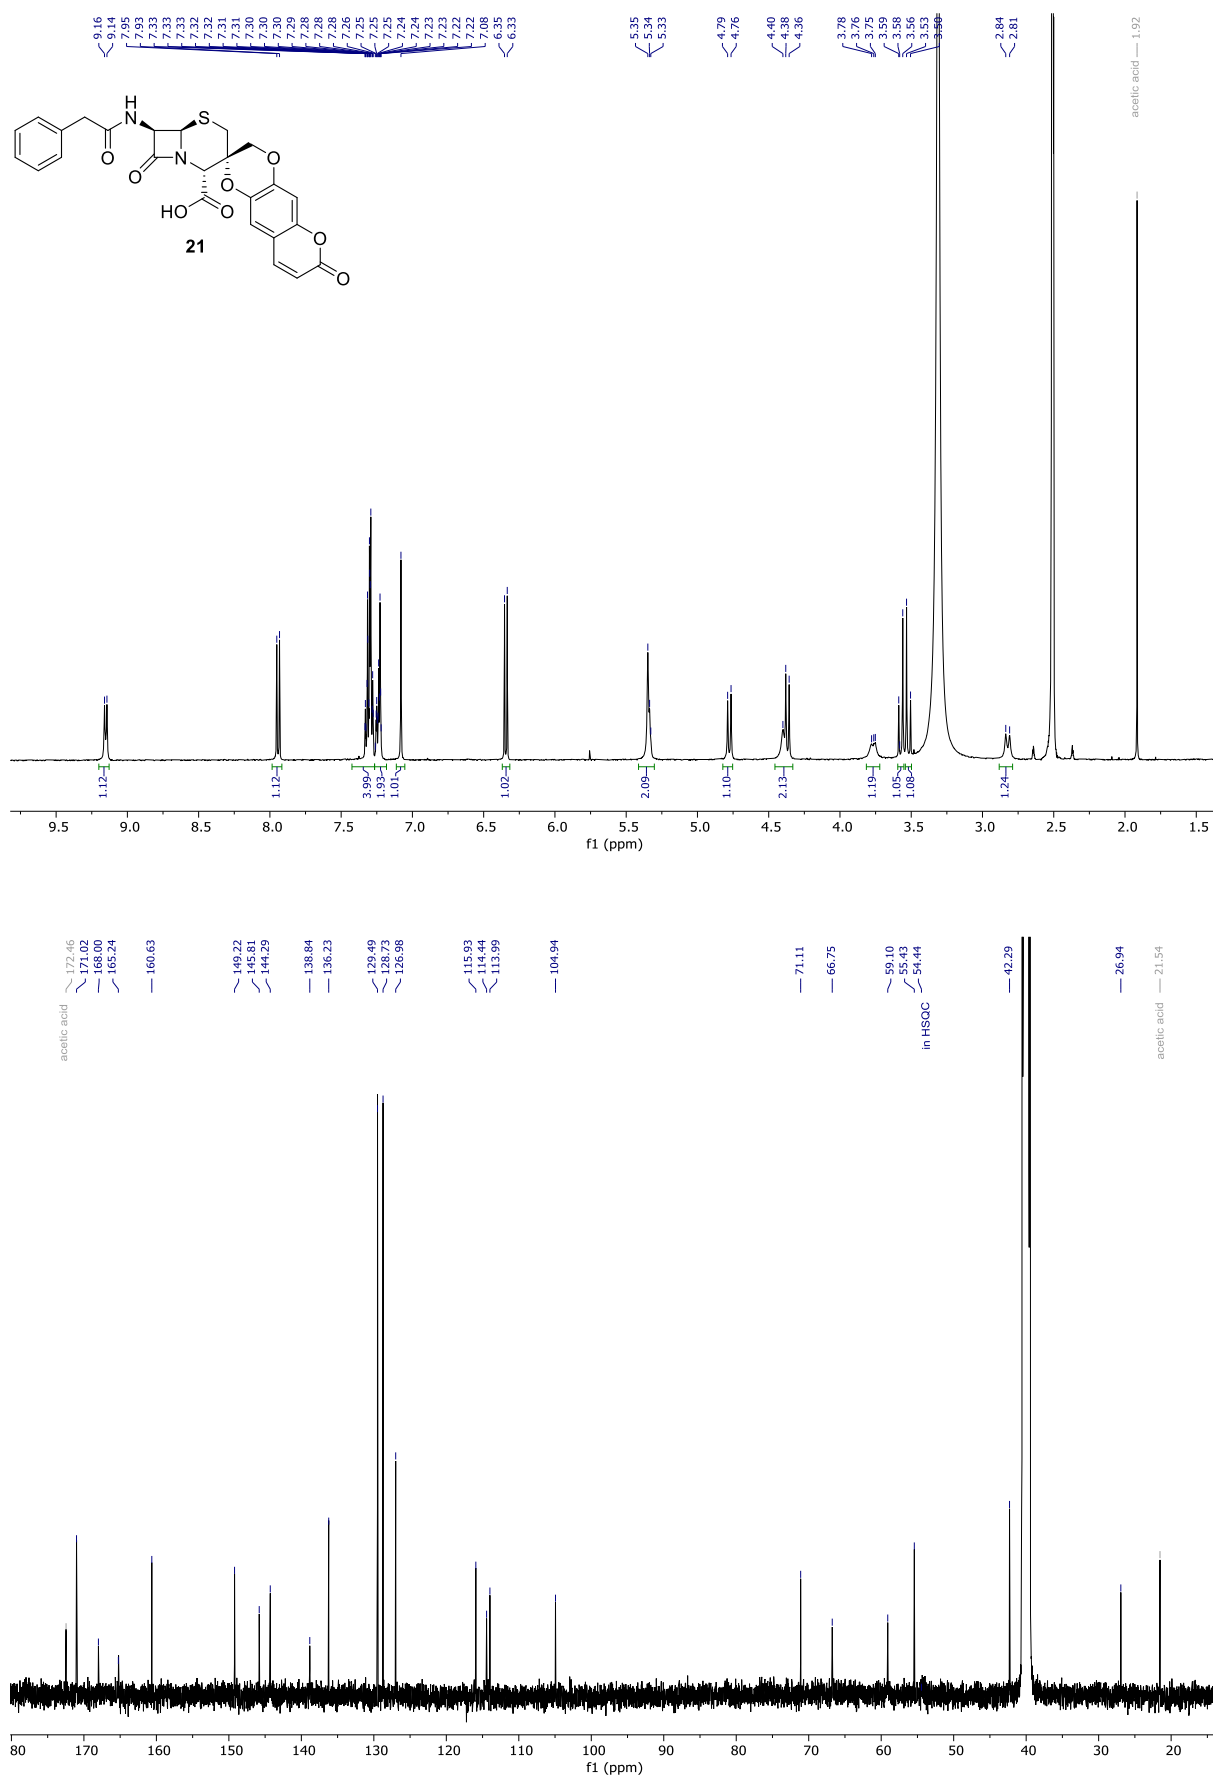

**Figure S9.**  $^1\text{H}$  (top) and  $^{13}\text{C}$  NMR (bottom) spectra of spiro-compound **21**.

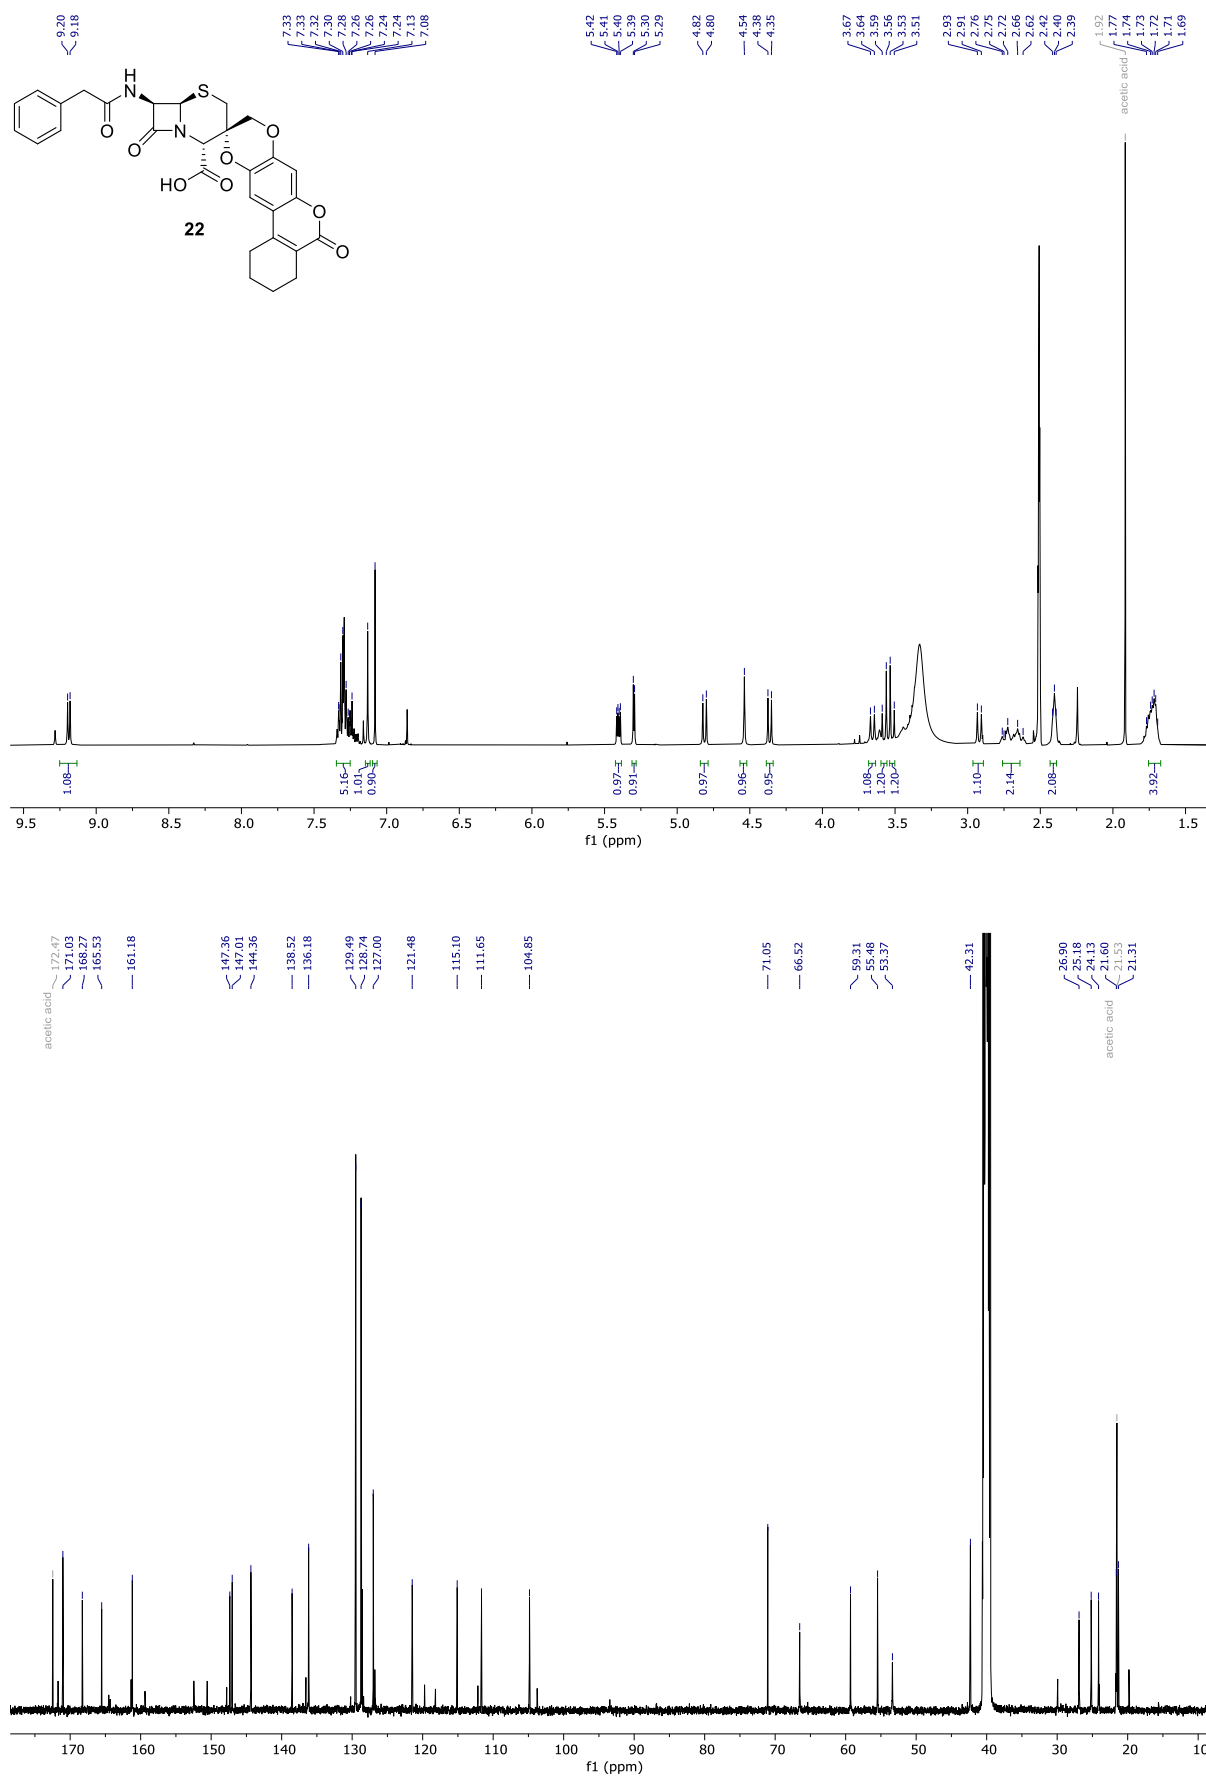

Figure S10.  $^1\text{H}$  (top) and  $^{13}\text{C}$  NMR (bottom) spectra of spiro-compound **22**.

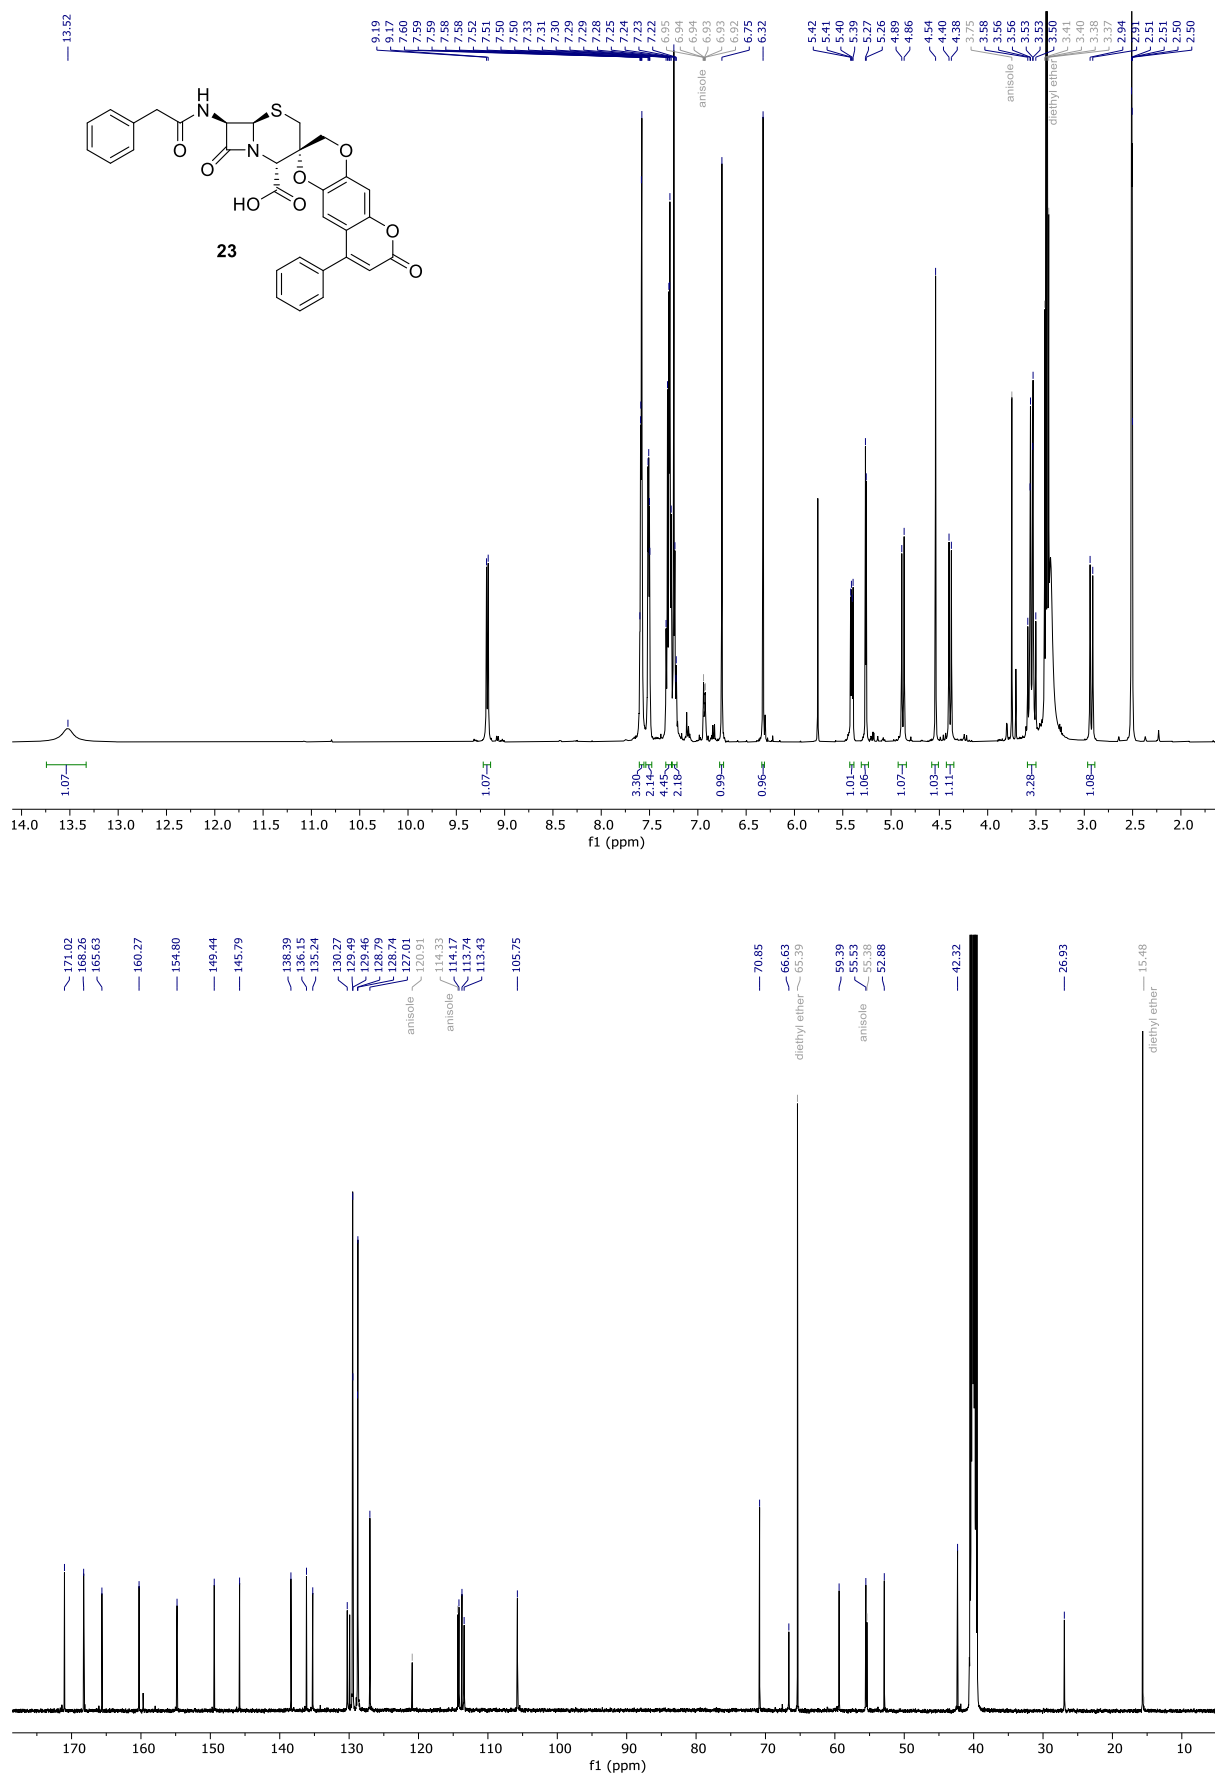

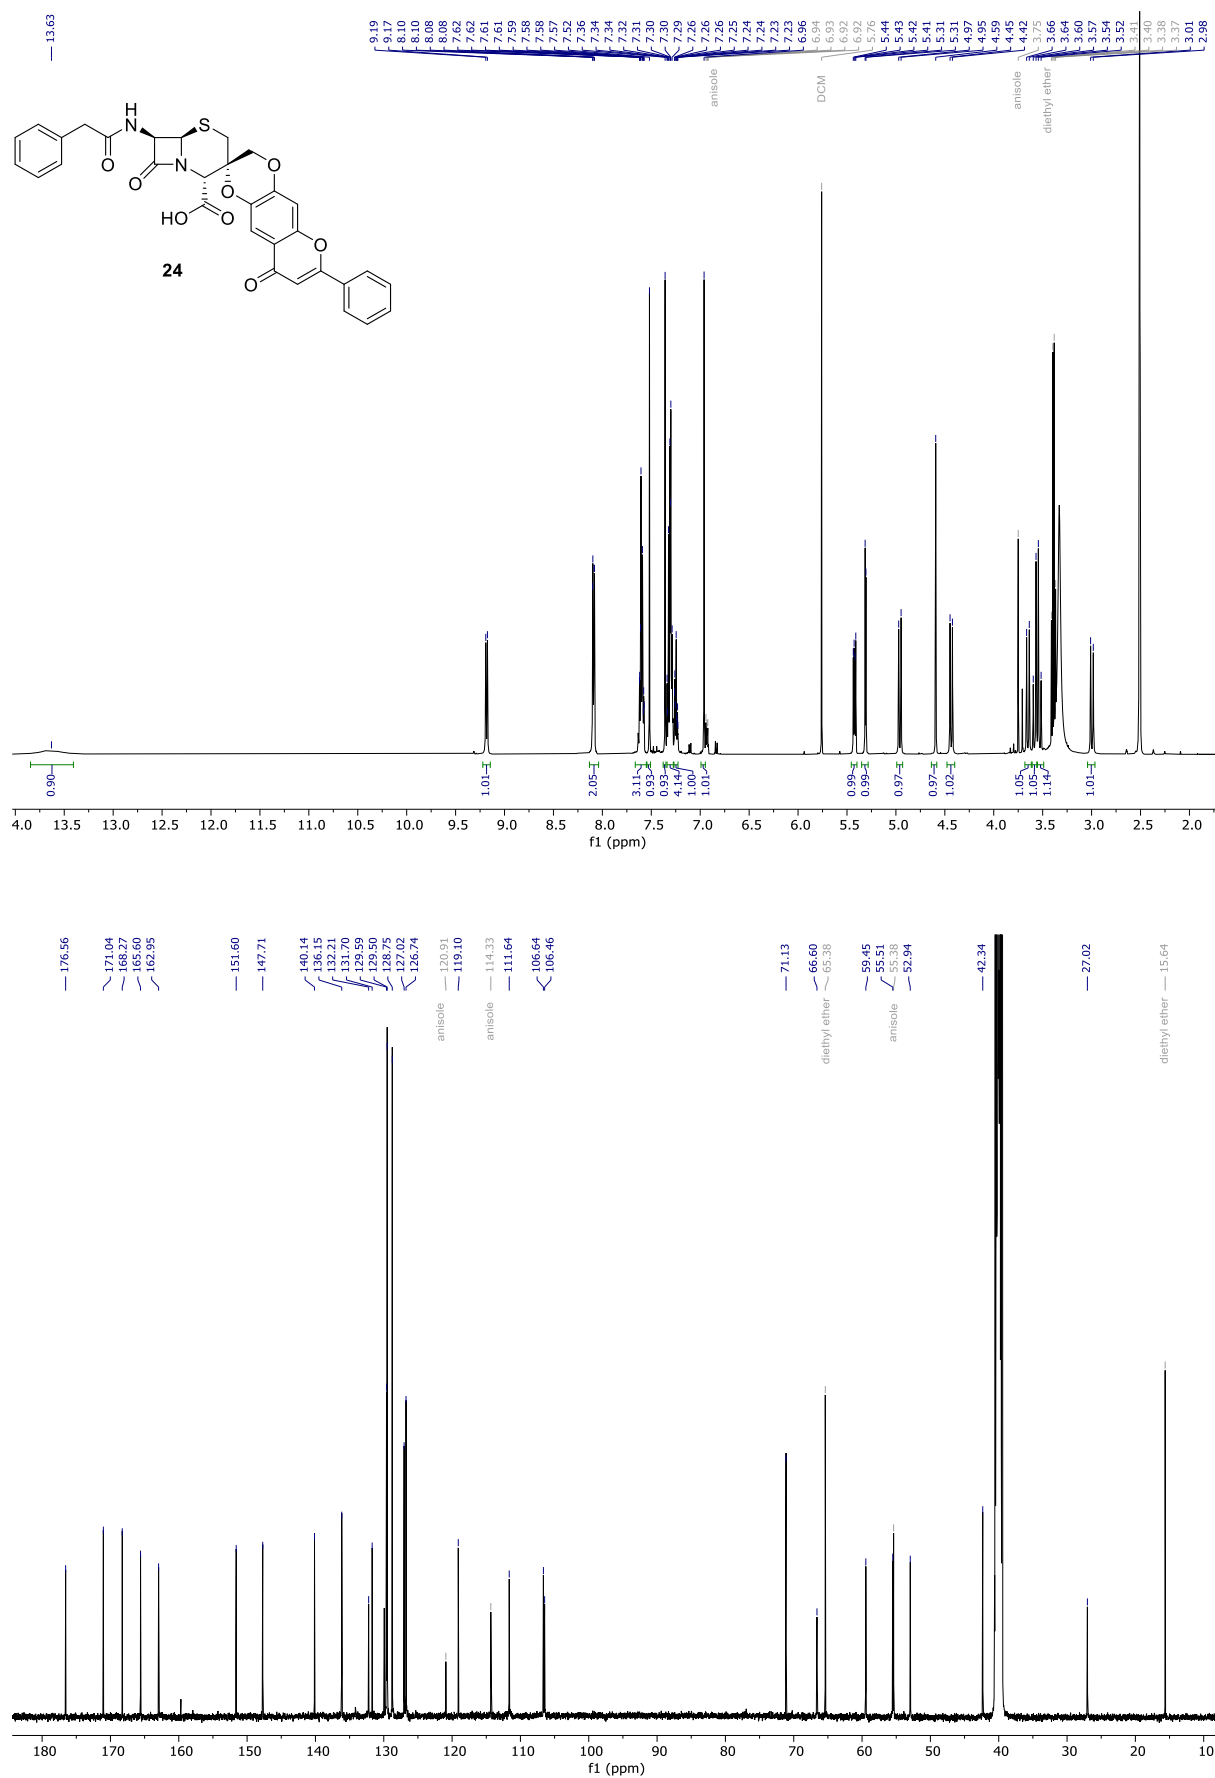

Figure S12.  $^1\text{H}$  (top) and  $^{13}\text{C}$  NMR (bottom) spectra of spiro-compound **24**.

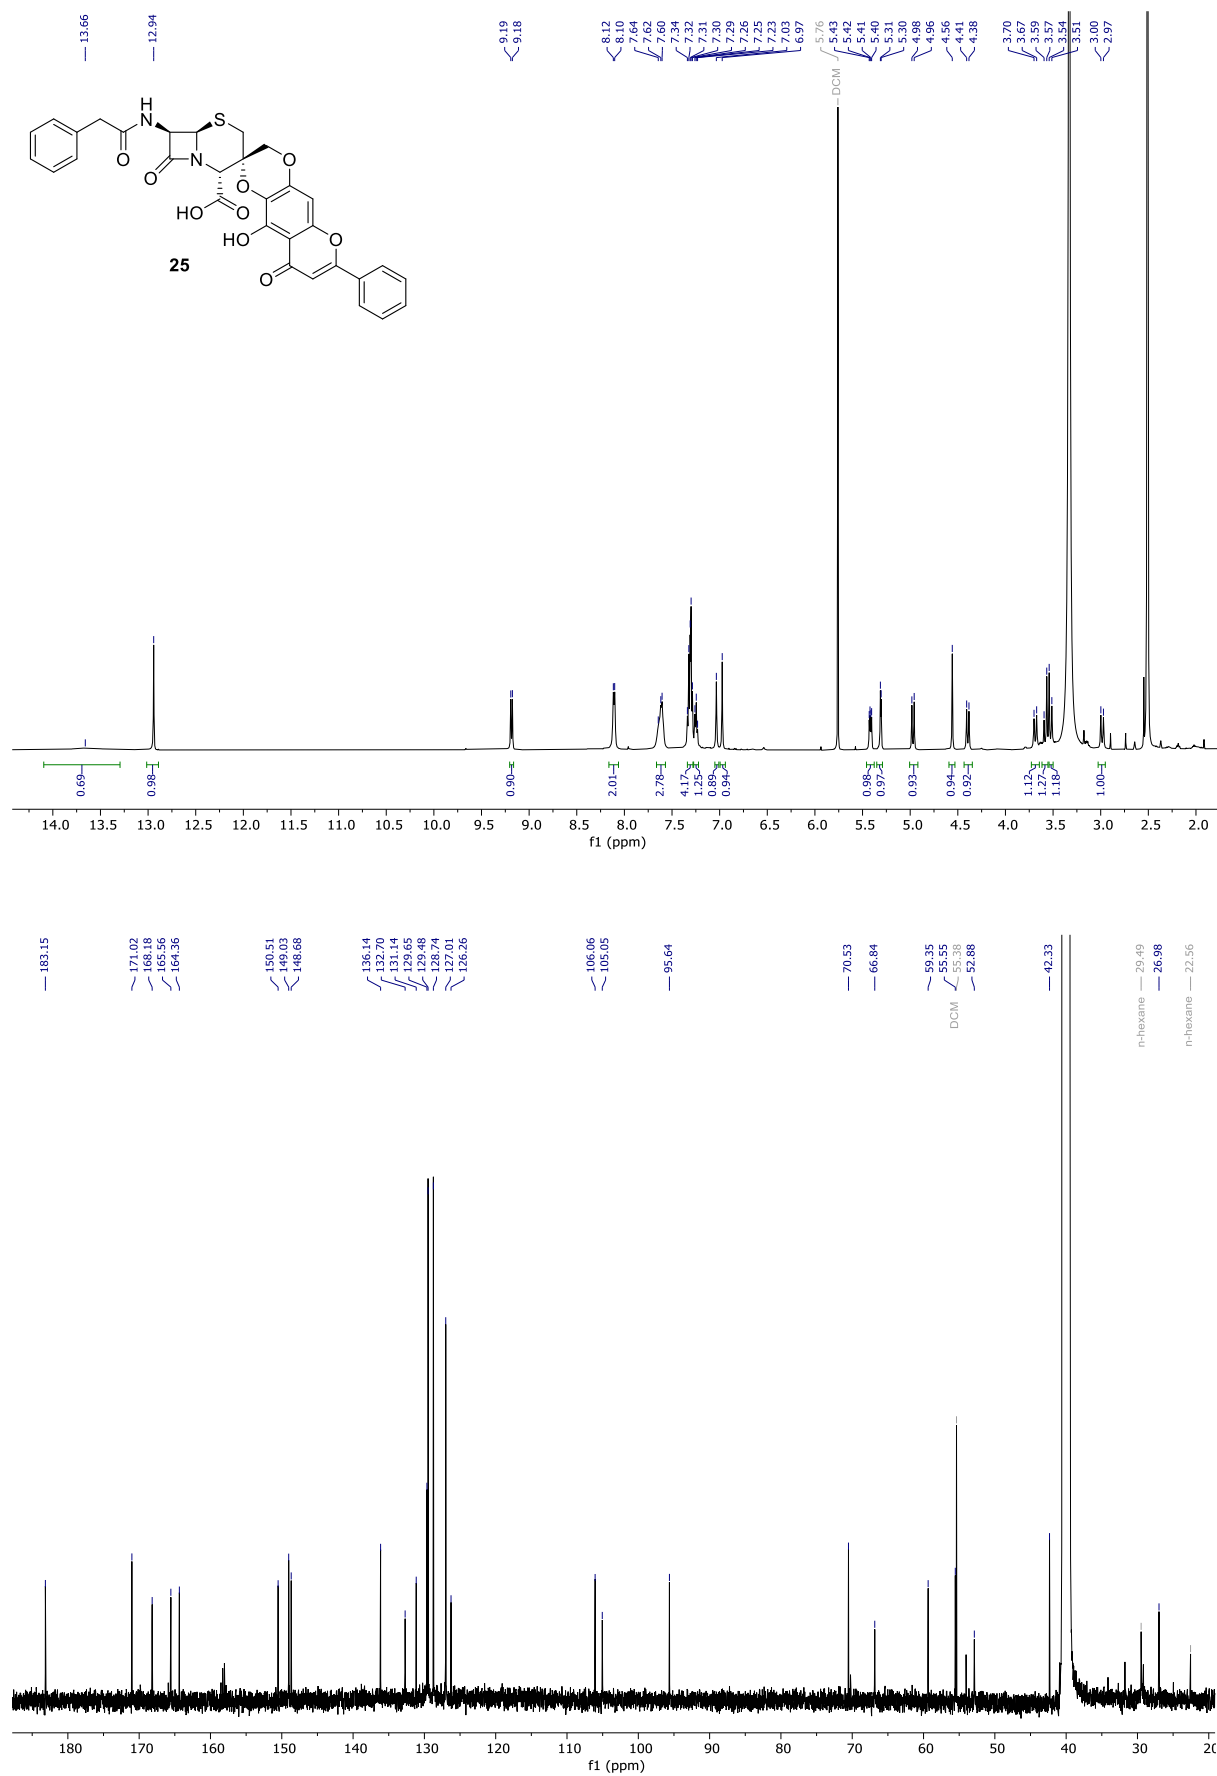

Figure S13.  $^1\text{H}$  (top) and  $^{13}\text{C}$  NMR (bottom) spectra of spiro-compound **25**.

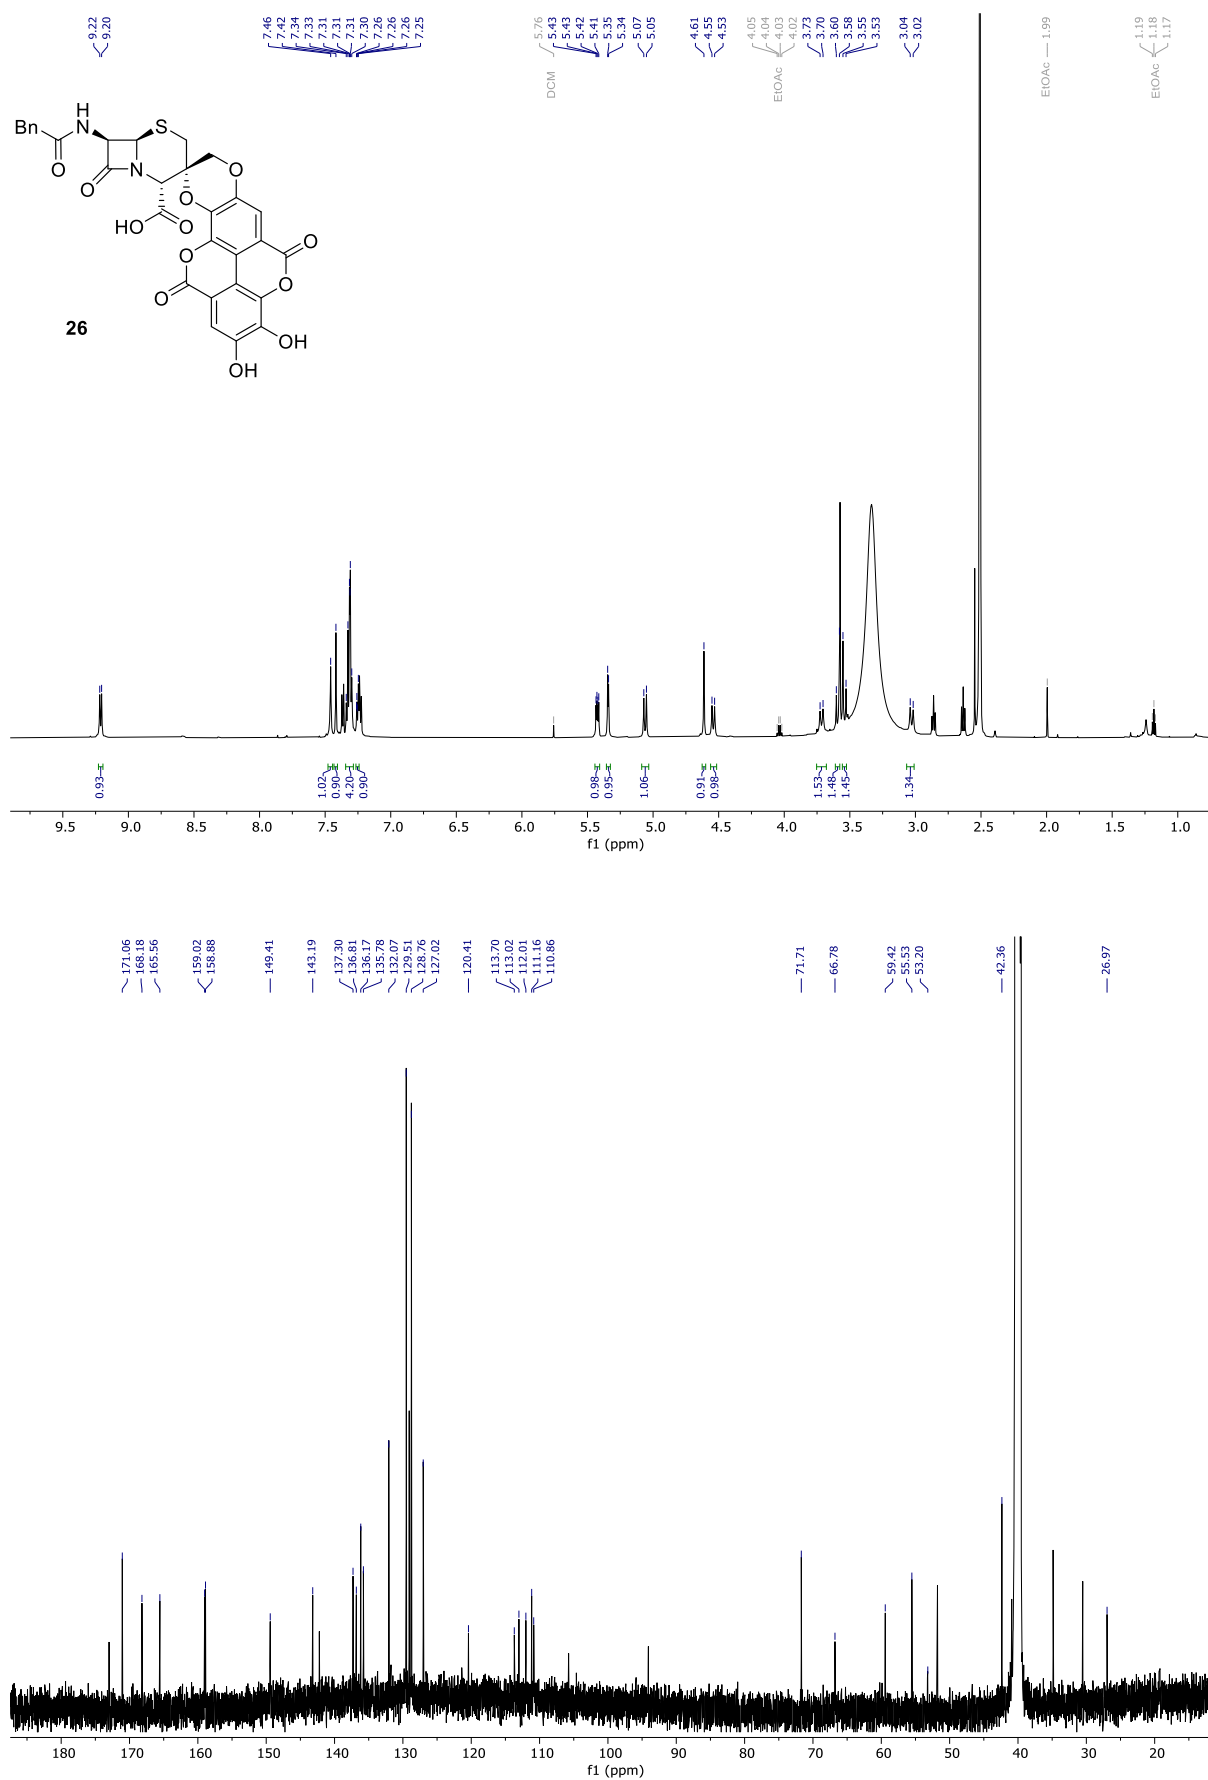

**Figure S14.**  $^1\text{H}$  (top) and  $^{13}\text{C}$  NMR (bottom) spectra of spiro-compound **26**.
