# Supplementary material
Source: MDPI journal article supplement (https://www.mdpi.com/1420-3049/26/19/6035)
Supplement: s1 [file s1]

Archive with 1 entries (1 files):
- molecules-1369175-SI file_updated_191021.pdf
